# Supplementary material for: Replicating the Hadley Cell and subtropical jet disconnect in idealized atmospheric models
Source: Copernicus journal article supplement (doi:10.5194/egusphere-2023-1645), 2023-07-24
Supplement: Supplementary file 1 [file egusphere-2023-1645-supplement.pdf]

# Supporting Document for “Replicating the Hadley Cell and subtropical jet disconnect in idealized atmospheric models”

Molly E. Menzel<sup>1</sup>, Darryn W. Waugh<sup>2</sup>, Zheng Wu<sup>3</sup>, and Thomas Reichler<sup>4</sup>

<sup>1</sup>NASA Goddard Institute for Space Studies, New York, New York

<sup>2</sup>Department of Earth and Planetary Sciences, The Johns Hopkins University, Baltimore, Maryland

<sup>3</sup>Institute for Atmospheric and Climate Science, ETH Zurich, Switzerland

<sup>4</sup>Department of Atmospheric Sciences, University of Utah, Salt Lake City, Utah

**Correspondence:** Molly E. Menzel (molly.menzel@nasa.gov)

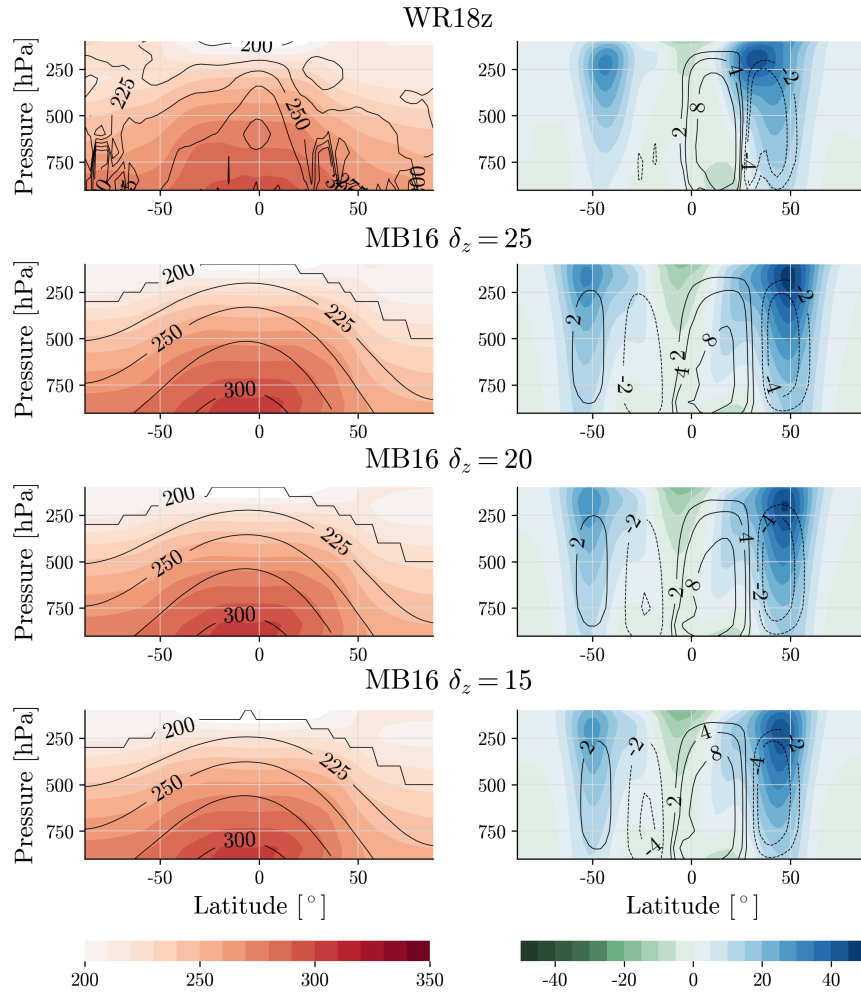

**Figure S1.** Zonal-mean DJF equilibrium temperature (left, black contour lines, K) and DJF climatology of the simulated temperature (left, color contours, K), zonal wind (right, color contours,  $\text{ms}^{-1}$ ), and mean meridional circulation (right, black contour lines,  $10^{10} \text{kg s}^{-1}$ ) for WR18z (top), MB16 ( $\delta_z = 25$ ) (middle top), MB16 ( $\delta_z = 20$ ) (middle bottom), and MB16 ( $\delta_z = 15$ ) (bottom).
